# Supplementary material for: Upregulation of Superenhancer‐Driven LncRNA FASRL by USF1 Promotes De Novo Fatty Acid Biosynthesis to Exacerbate Hepatocellular Carcinoma
Source: PubMed Central journal article supplement (PMC9811444; doi:10.1002/advs.202204711), 2022-10-28
Supplement: ADVS-10-2204711-s001.pdf [file ADVS-10-2204711-s001.pdf]

## Supporting Information

for *Adv. Sci.*, DOI 10.1002/adv.202204711

Upregulation of Superenhancer-Driven LncRNA FASRL by USF1 Promotes De Novo Fatty Acid Biosynthesis to Exacerbate Hepatocellular Carcinoma

*Jiang-Yun Peng, Dian-Kui Cai, Ren-Li Zeng, Chao-Yang Zhang, Guan-Cheng Li, Si-Fan Chen, Xiao-Qing Yuan and Li Peng\**

## Supporting Information

### Upregulation of Superenhancer-driven lncRNA FASRL by USF1 Promotes *De Novo* Fatty Acid Biosynthesis to Exacerbate Hepatocellular Carcinoma

Jiang-Yun Peng, Dian-Kui Cai, Ren-Li Zeng, Chao-Yang Zhang, Guan-Cheng Li, Si-Fan Chen,

Xiao-Qing Yuan, Li Peng\*

#### Supporting Figures

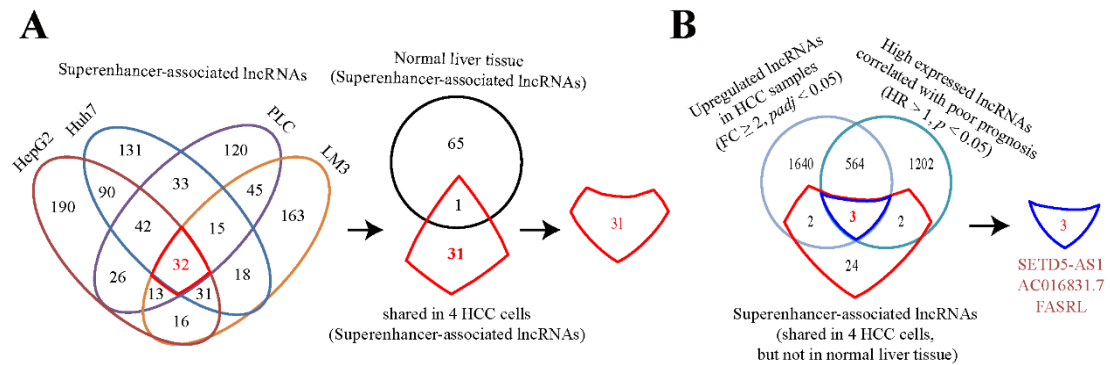

**Figure S1. The screening process of superenhancer-associated lncRNAs with potential clinical value in HCC.** (A) Venn diagram showing the superenhancer-associated lncRNAs shared by HepG2, Huh7, PLC and LM3 cells, excluding those in normal liver tissues. (B) Venn diagram exhibiting 3 superenhancer-associated lncRNAs, SETD5-AS1, AC016831.7 and FASRL, in the HCC cell lines that were upregulated in the HCC samples and their high expression was correlated with a worse prognosis.

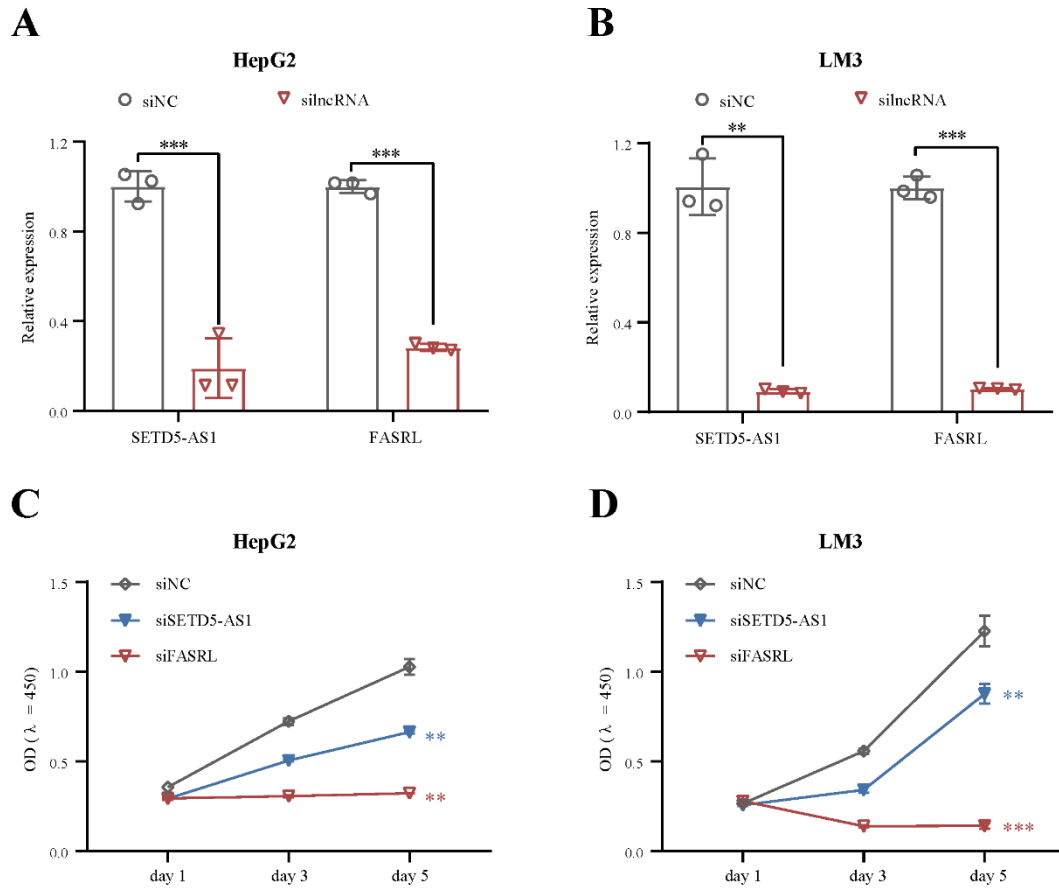

**Figure S2. Effect of siRNA-mediated SETD5-AS1 and FASRL interference on cell proliferation in HCC cell lines.** (A, B) qRT-PCR assay detecting the knockdown effect on the (A) HepG2 and (B) LM3 cell lines transfected with siRNA pools targeting SETD5-AS1 and FASRL. (C, D) CCK-8 assay showing the proliferation of the (C) HepG2 and (D) LM3 cell lines transfected with siSETD5-AS1, siFASRL and siNC. The data are expressed as the mean  $\pm$  SD. \*\*,  $p < 0.01$ ; \*\*\*,  $p < 0.001$

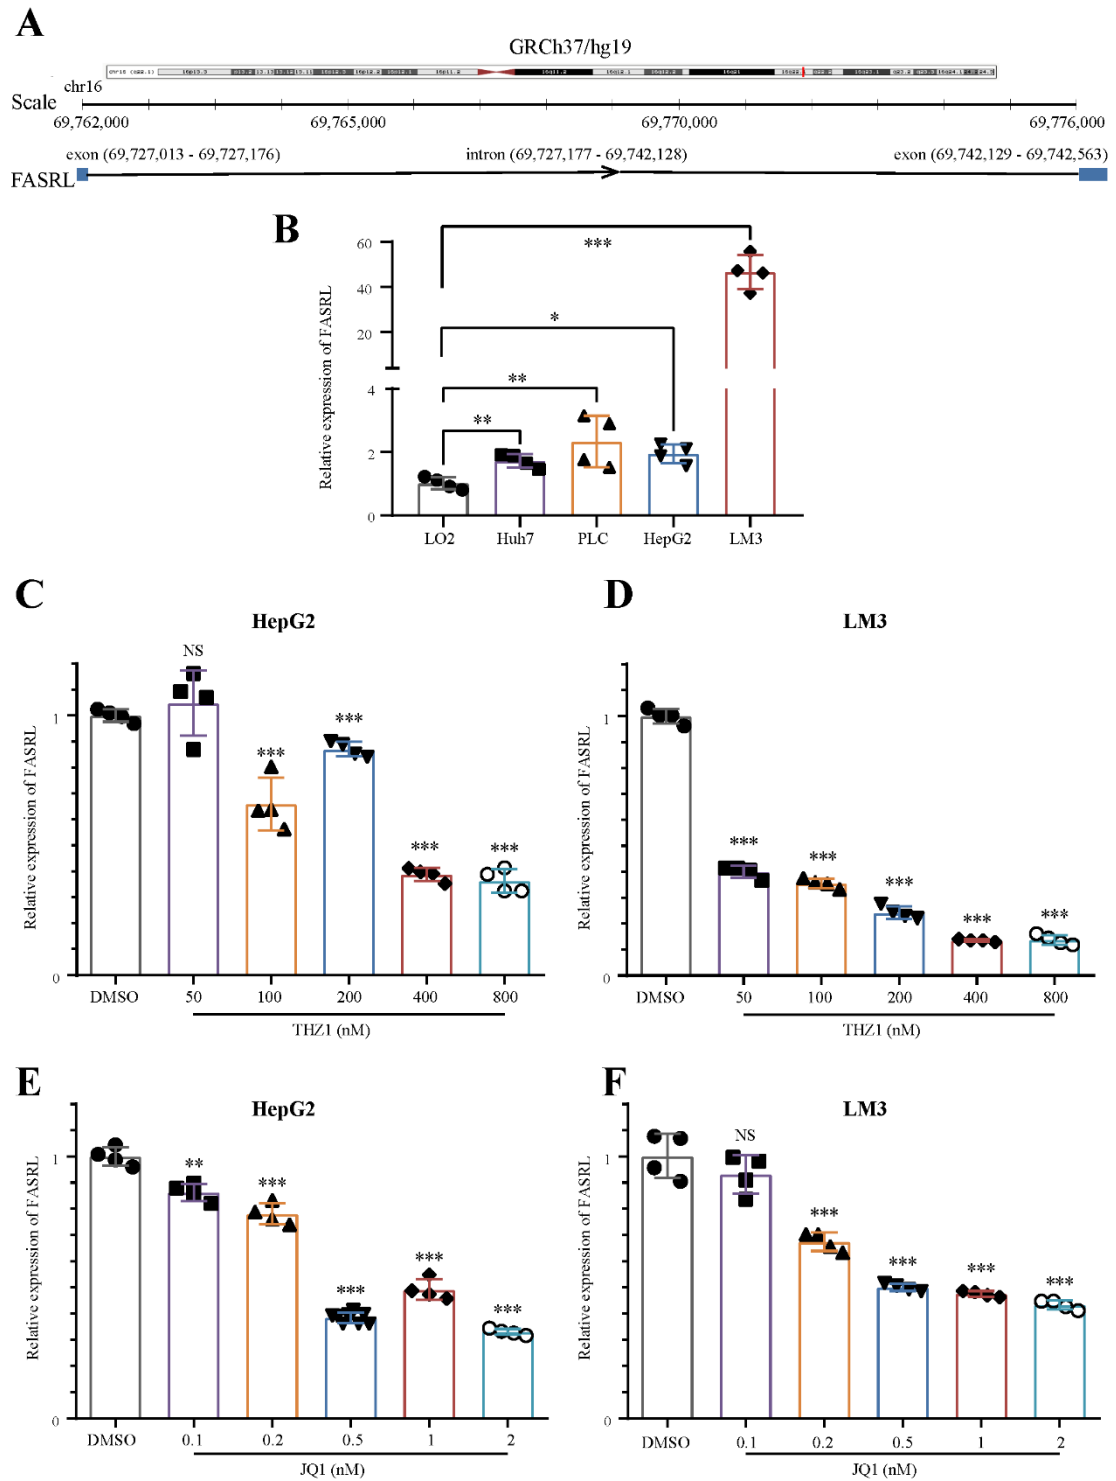

**Figure S3. A novel superenhancer-related lncRNA, FASRL, was identified in HCC.** (A) The location of FASRL in the genome, and the arrow indicates the FASRL transcription direction. (B) The relative expression of FASRL in the normal liver cell line LO2 and four HCC cell lines, Huh7, PLC, HepG2 and LM3. (C, D) The relative expression of FASRL in the (C) HepG2 and (D) LM3

cell lines treated with the CDK7 inhibitor THZ1. (E, F) The relative expression of FASRL in the (E) HepG2 and (F) LM3 cell lines treated with the BRD4 inhibitor JQ1. The data are expressed as the mean  $\pm$  SD. NS, non-significance; \*,  $p < 0.05$ ; \*\*,  $p < 0.01$ ; \*\*\*,  $p < 0.001$

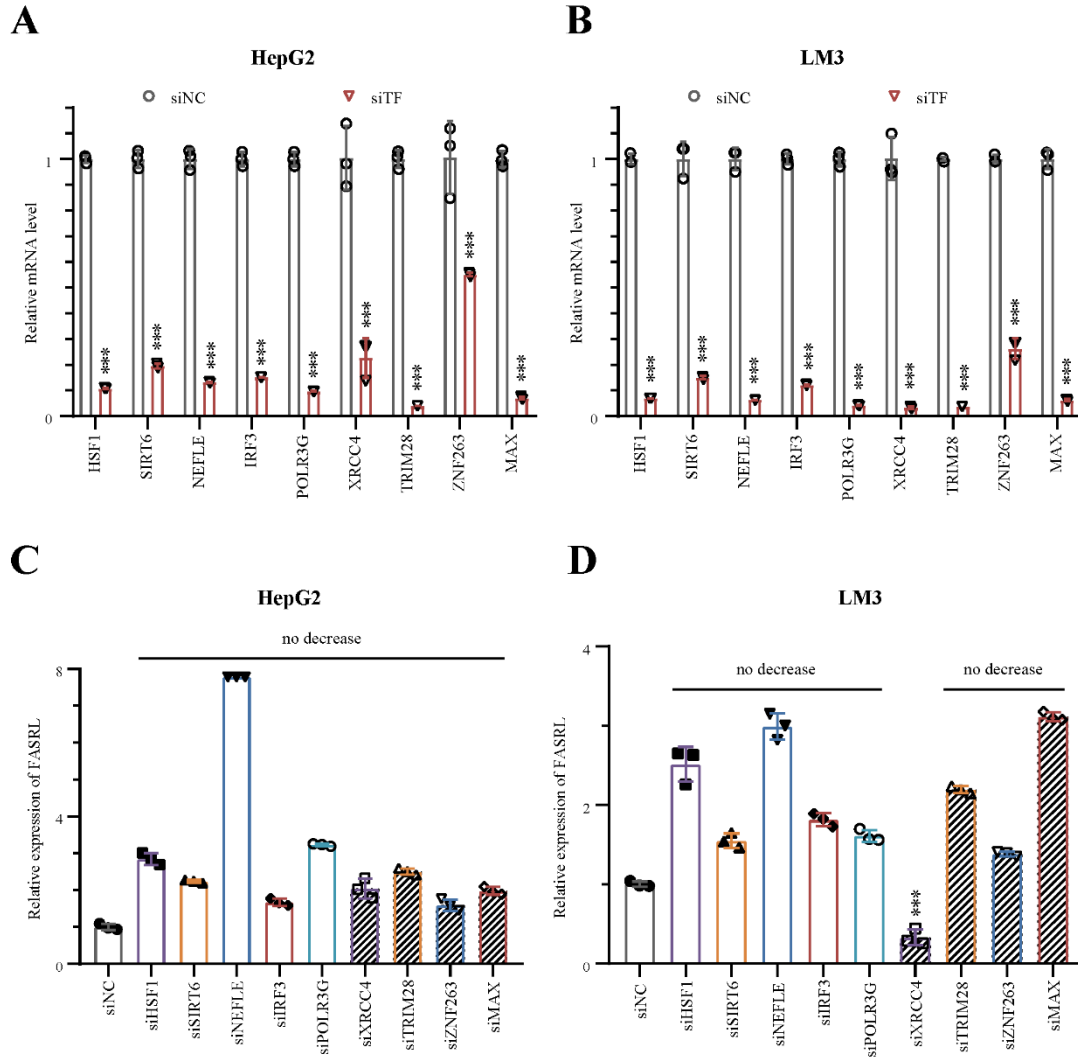

**Figure S4. Screening for the upstream transcription factors of FASRL.** (A, B) qRT-PCR assay showing the efficiency of the siRNA pool-mediated knockdown of 9 TFs in the (A) HepG2 and (B) LM3 cell lines. (C, D) qRT-PCR showing the expression of FASRL in the (C) HepG2 and (D) LM3 cell lines transfected with siRNA pool-mediated knockdown of 9 TFs. The data are expressed as the mean  $\pm$  SD. \*\*\*,  $p < 0.001$

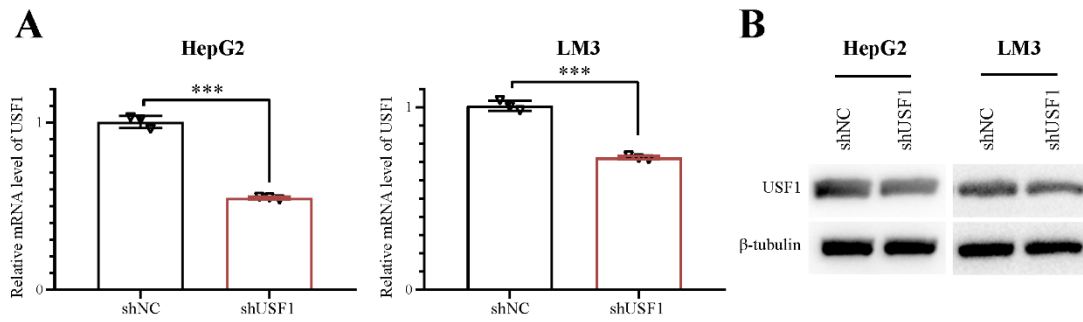

**Figure S5. Knockdown efficiency of USF1 shRNA in HCC cell lines.** (A) qRT-PCR assay showing the mRNA level of USF1 in the (left) HepG2 and (right) LM3 cell lines with shRNA-mediated USF1 knockdown. (B) Western blot assay showing the protein content of USF1 in the (left) HepG2 and (right) LM3 cell lines after the shRNA-mediated USF1 knockdown. The data are expressed as the mean  $\pm$  SD. \*\*\*,  $p < 0.001$

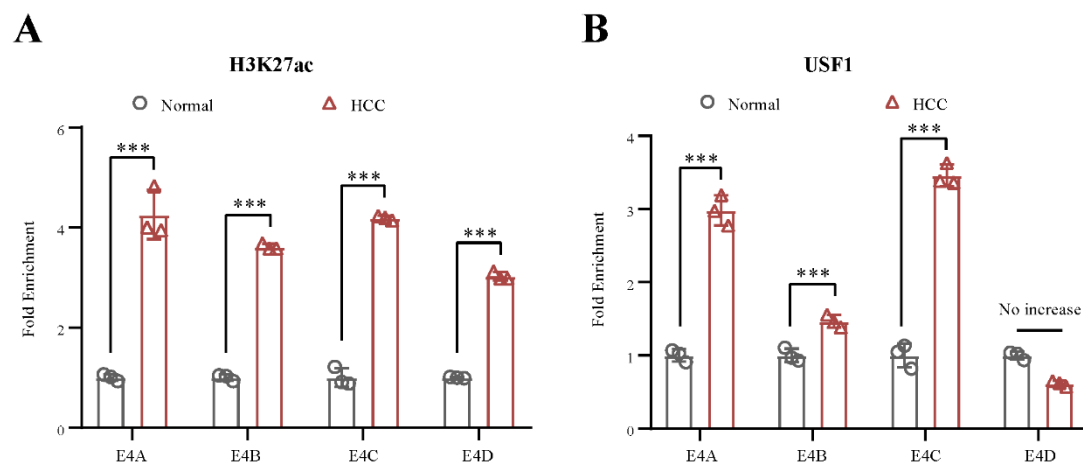

**Figure S6. ChIP-qPCR of H3K27ac and USF1 in HCC patient tissues.** (A) ChIP-qPCR of H3K27ac of the superenhancer components in tumor and paired normal liver tissues from HCC patients. (B) ChIP-qPCR of USF1 of the superenhancer components in tumor and paired normal liver tissues from HCC patients. The data are expressed as the mean  $\pm$  SD. \*\*\*,  $p < 0.001$

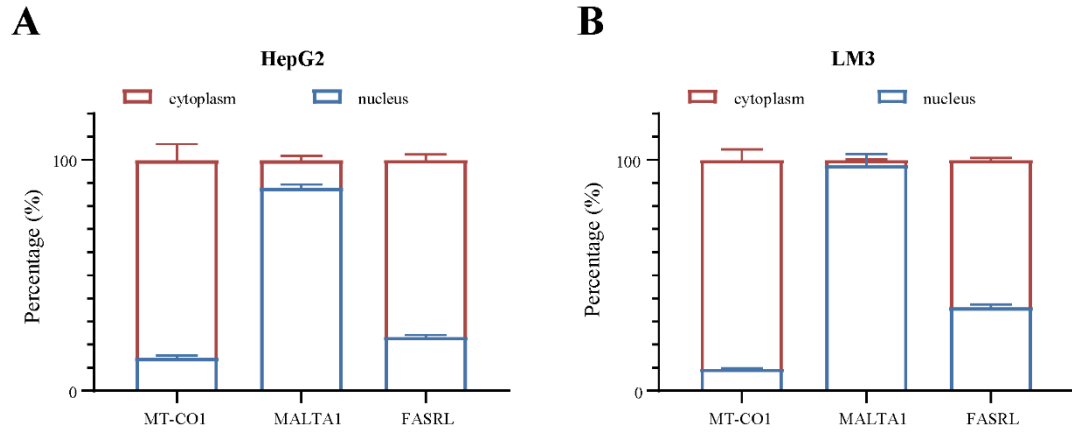

**Figure S7. Subcellular distribution of FASRL.** (A, B) FASRL was distributed in the cytoplasm and nucleus in the (A) HepG2 and (B) LM3 cell lines. MT-CO1 is a marker of the cell cytoplasm, and MALAT1 is a marker of the cell nucleus. The data are expressed as the mean  $\pm$  SD.

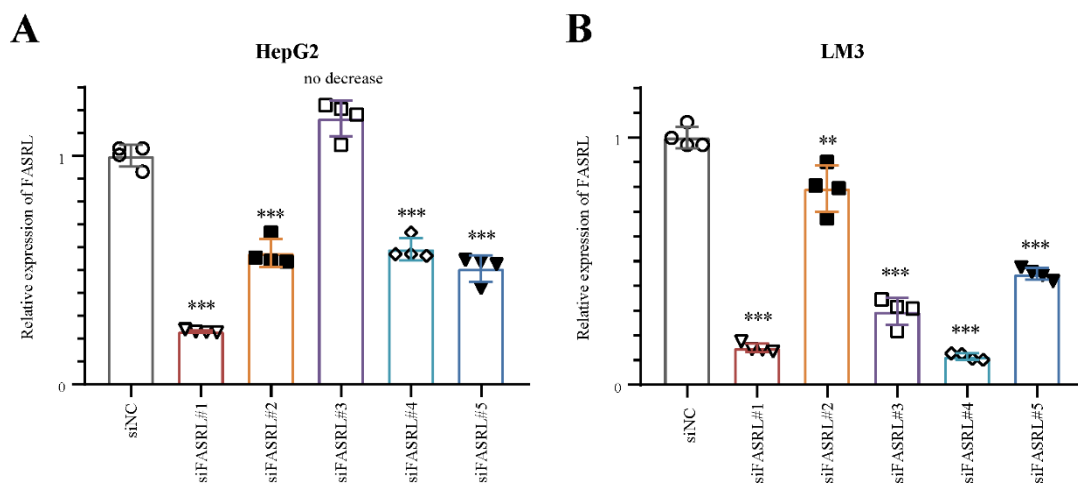

**Figure S8. Interference effect of siRNAs targeting FASRL in HCC cells.** (A, B) The effects of 5 different siRNA sequences specifically targeting FASRL on FASRL expression in (A) HepG2 and (B) LM3 cell lines. The data are expressed as the mean  $\pm$  SD. \*\*,  $p < 0.01$ ; \*\*\*,  $p < 0.001$

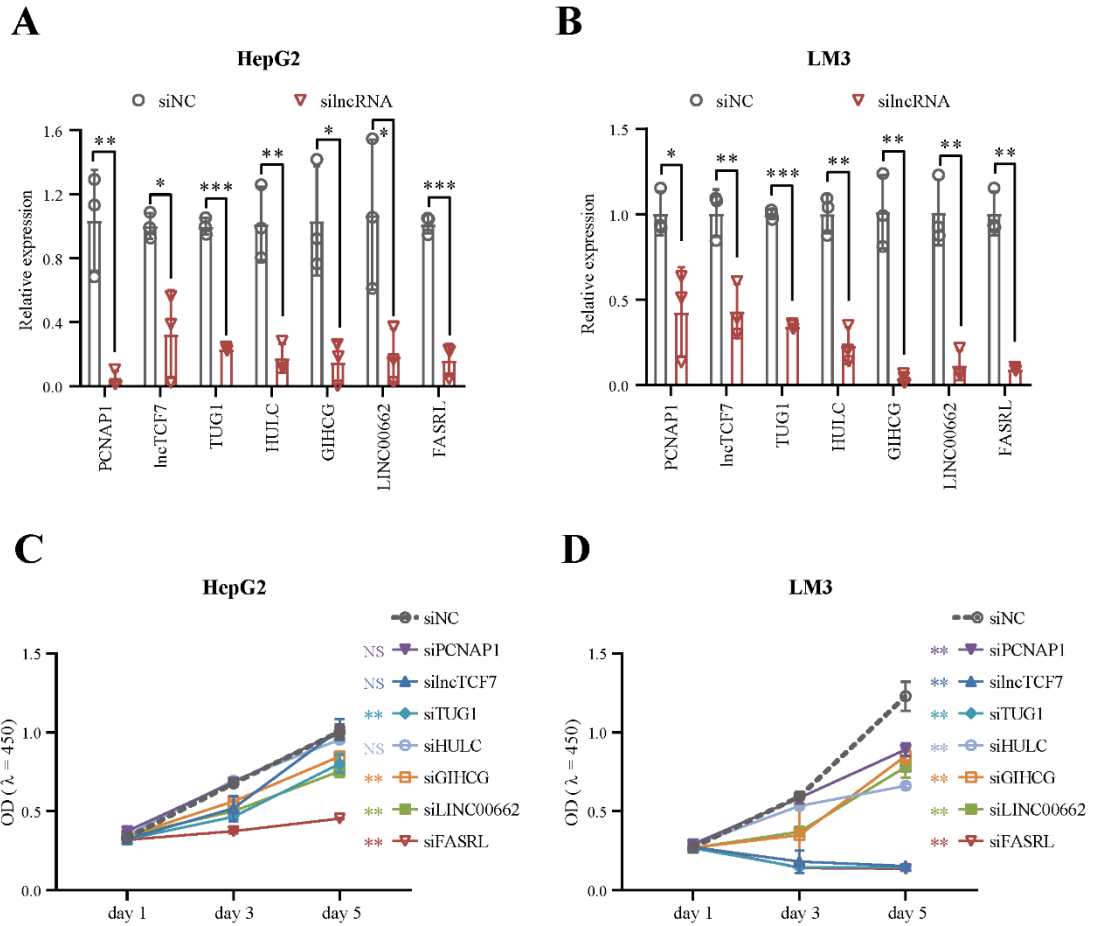

**Figure S9. The effect of FASRL knockdown on cell proliferation in HCC cell lines.** (A, B) The knockdown effect of lncRNA PCNAP1, lncTCF7, TUG1, HULC, GIHCG, LINC00662 and FARSL in the (A) HepG2 and (B) LM3 cell lines transfected with the corresponding siRNA pools. (C, D) CCK-8 assay revealing the effect of the siRNA pool-mediated knockdown of lncRNA PCNAP1, lncTCF7, TUG1, HULC, GIHCG, LINC00662 and FARSL on cell growth in the (C) HepG2 and (D) LM3 cell lines. The data are expressed as the mean  $\pm$  SD; NS, non-significance; \*,  $p < 0.05$ ; \*\*,  $p < 0.01$ ; \*\*\*,  $p < 0.001$



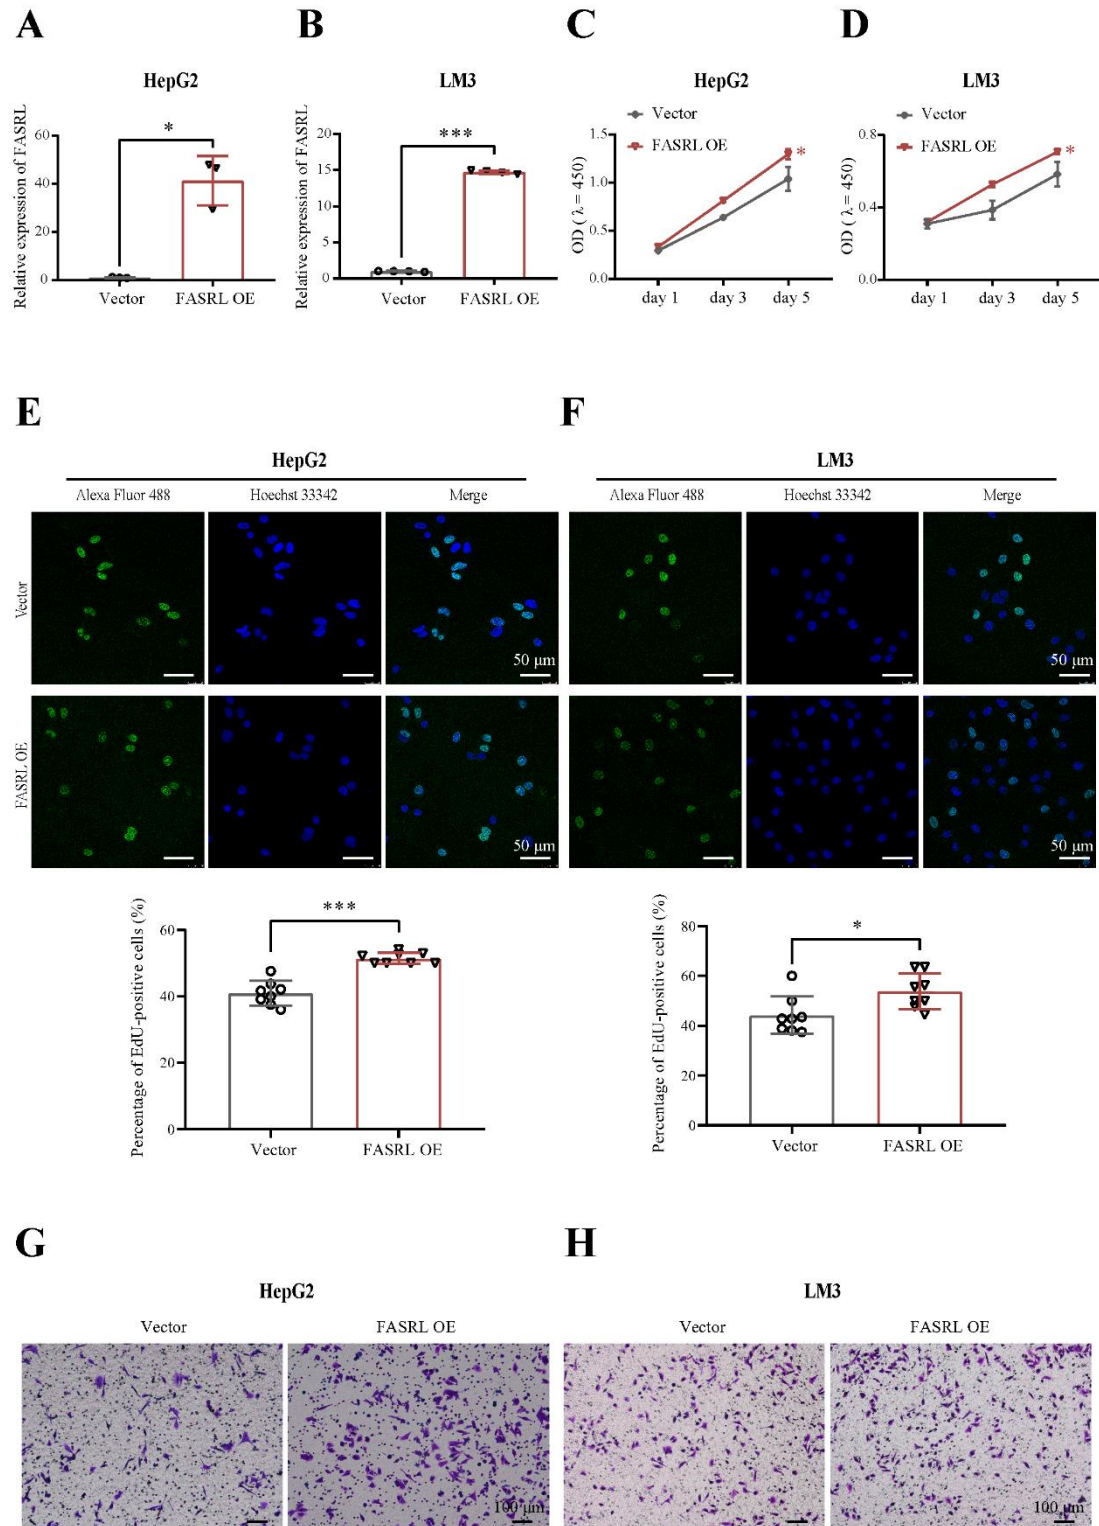

**Figure S10. The effect of FASRL overexpression on the proliferation and migration of HCC cell lines.** (A, B) The FASRL overexpression in (A) HepG2 and (B) LM3 cell lines. (C, D) CCK-8 assay revealing the growth of the (C) HepG2 and (D) LM3 cell lines with FASRL overexpression or its control. (E, F) EdU assay revealing the proliferation of (E) HepG2 and (F) LM3 cell lines

with FASRL overexpression or its control. (G, H) Transwell assay showing the cell migration ability of the (G) HepG2 and (H) LM3 cell lines with FASRL overexpression or its control,  $n=8$  fields. OE, overexpression. The data are expressed as the mean  $\pm$  SD. \*,  $p<0.05$ ; \*\*\*,  $p<0.001$

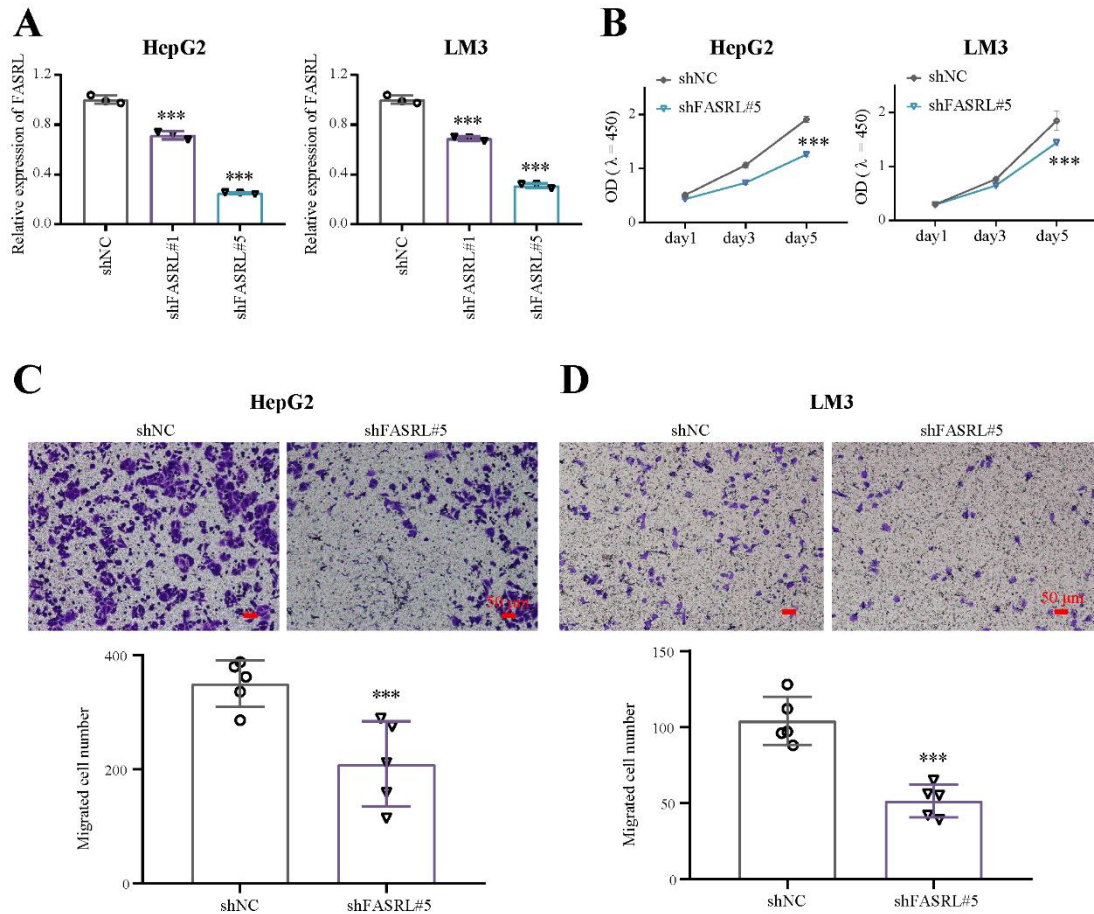

**Figure S11. The effect of shRNA-mediated FASRL knockdown on HCC progression *in vitro*.** (A) The relative expression of FASRL in the (A) HepG2 and (B) LM3 cell lines stably transfected with shFASRL#1, shFASRL#5 and control shNC. (B) CCK-8 assay showing the growth of the HepG2 and LM3 cell lines stably transfected with shFASRL#5 and control shNC. (C, D) Upper panel, the cell migration ability of the (C) HepG2 and (D) LM3 cell lines stably transfected with shFASRL#5 and control shNC as determined by a Transwell assay. Bottom, the corresponding statistical data of the results in the upper panel. The data are expressed as the mean  $\pm$  SD. \*\*\*,  $p<0.001$

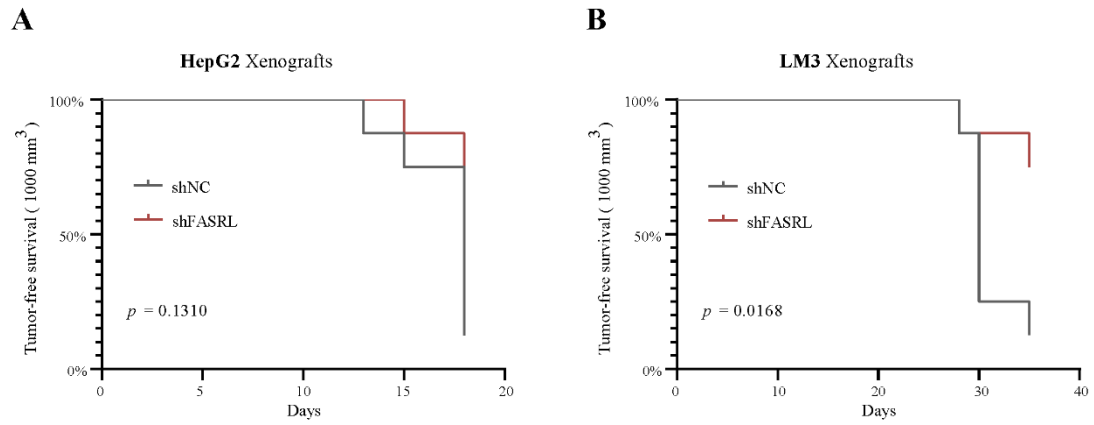

**Figure S12. The effect of FASRL knockdown on HCC survival in nude mice.** (A, B) Kaplan–Meier survival curves of the shFASRL group and control shNC group of HCC xenograft tumors derived from the (A) HepG2 and (B) LM3 cell lines,  $n=8$ .

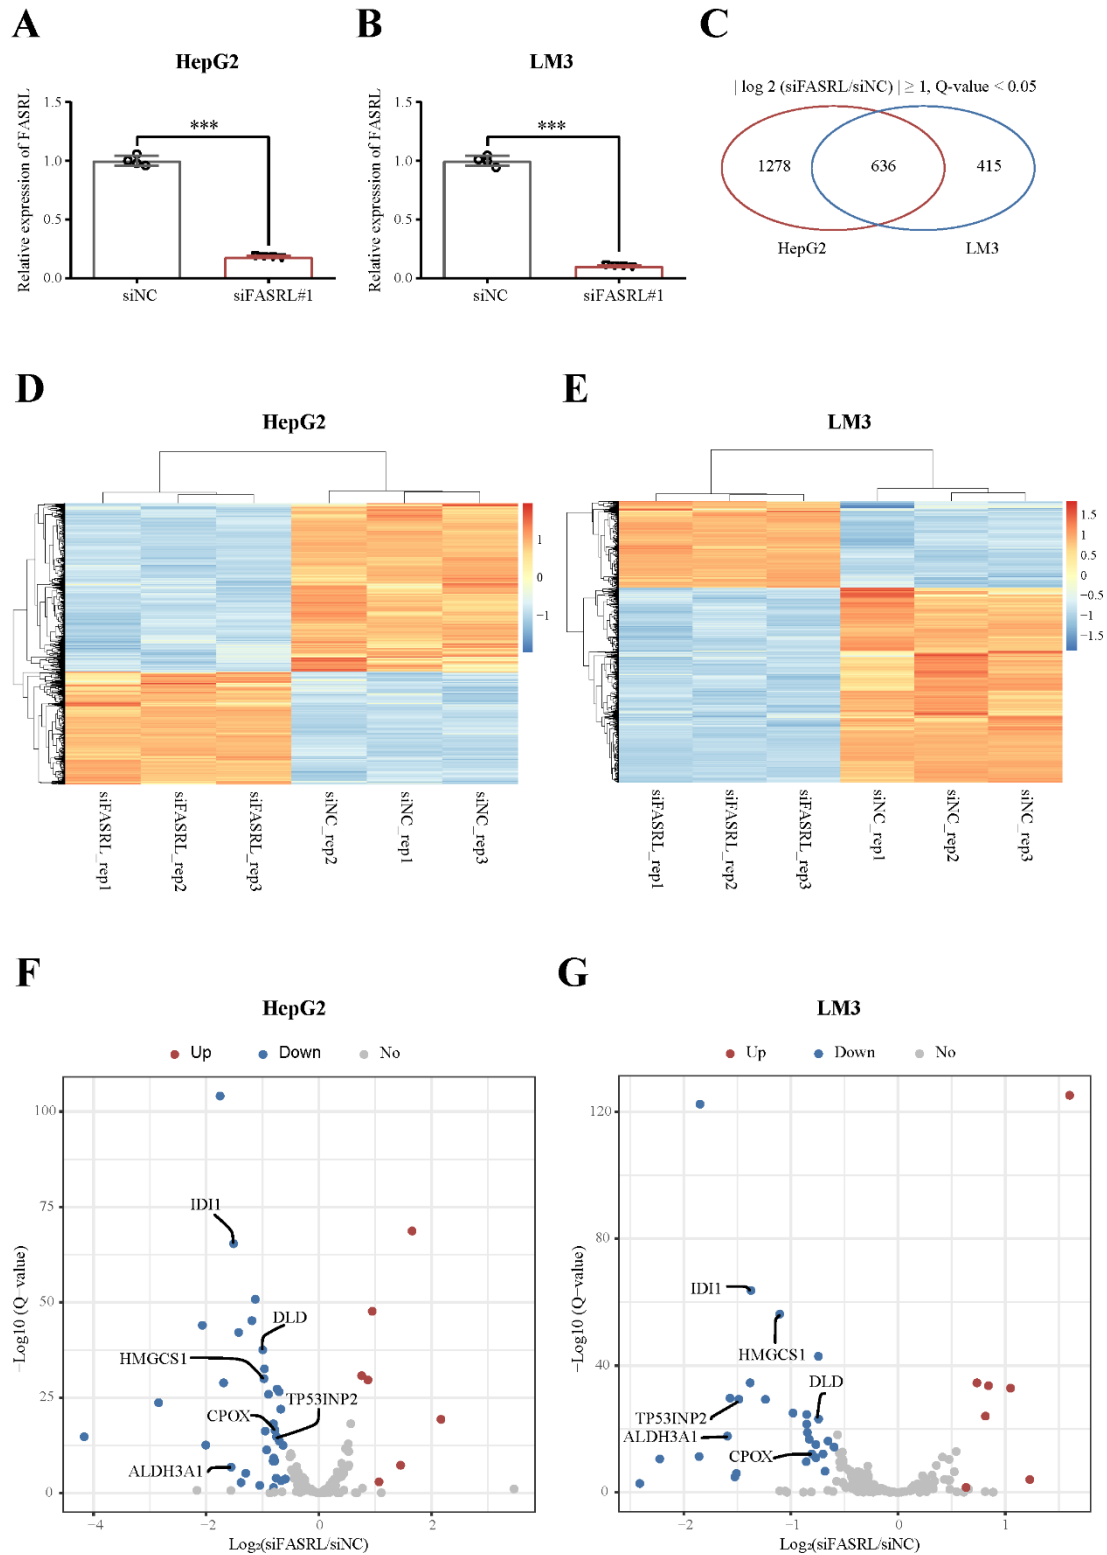

**Figure S13. RNA-seq analysis after the knockdown of FASRL in HCC cell lines.** (A, B) The knockdown effect of siRNA targeting FASRL in the (A) HepG2 and (B) LM3 cell lines. (C) The Venn diagram showing a total of 636 differentially expressed genes with  $|\log_2(\text{siFASRL}/\text{siNC})| \geq 1$

and Q value<0.05 that were shared in the HepG2 and LM3 cell lines after FASRL knockdown. (D, E) Heatmap showing the cluster analysis results of genes with altered expression in (D) HepG2 and (E) LM3 cell lines after FASRL knockdown. (F, G) Volcano plot showing the upregulated genes (red dots), downregulated genes (blue dots) and genes with unchanged expression (gray dots) in fatty acid metabolism pathway in (F) HepG2 and (G) LM3 cell lines after FASRL knockdown. Up, upregulated; Down, downregulated. The data are expressed as the mean  $\pm$  SD. \*\*\*,  $p < 0.001$

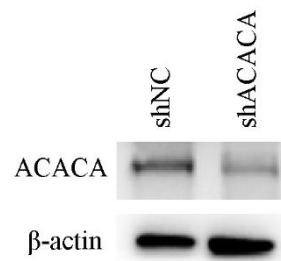

**Figure S14. Knockdown efficiency of ACACA shRNA in HCC cell line.** Western blot assay showing the protein content of ACACA in the HepG2 cell line after the shRNA-mediated ACACA knockdown.

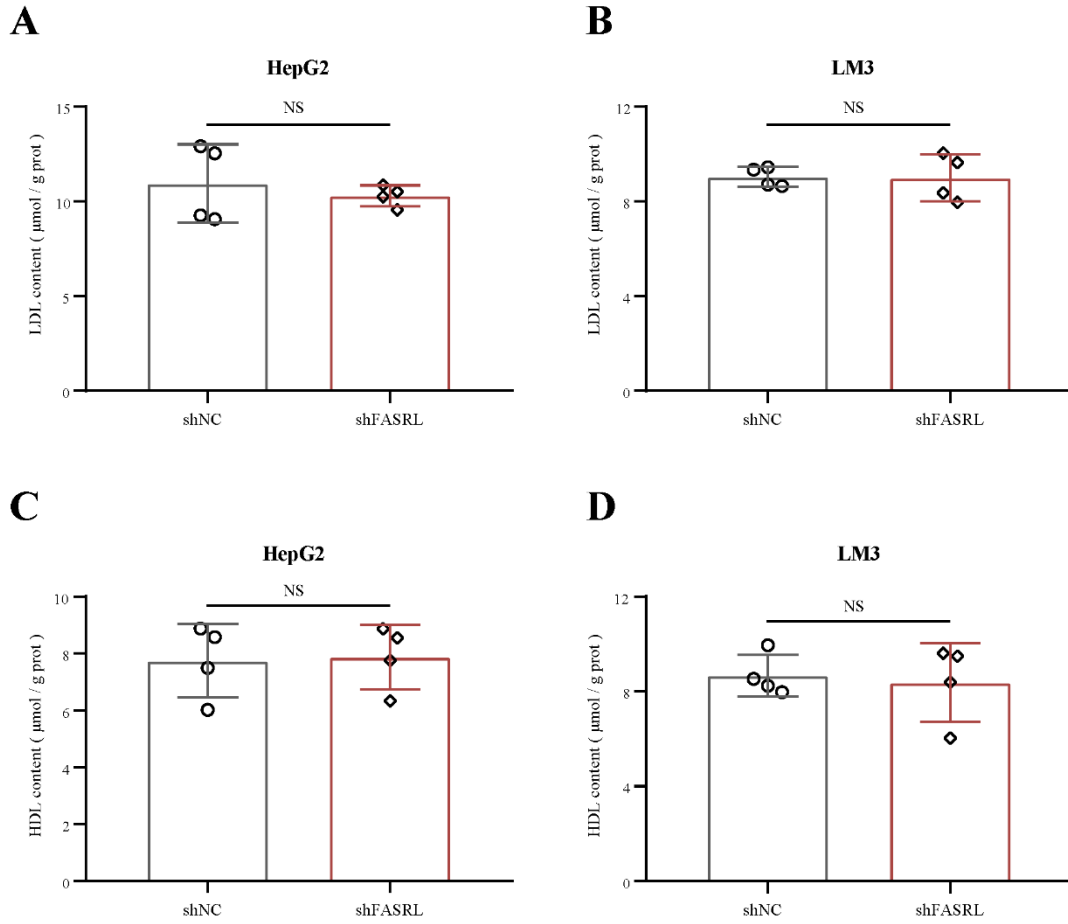

**Figure S15. The effect of FASRL knockdown on the LDL and HDL contents in HCC cell lines.** (A, B) LDL levels in (A) HepG2 and (B) LM3 cells stably transfected with shFASRL and control shNC,  $n=4$ . (C, D) HDL levels in (C) HepG2 and (D) LM3 cells stably transfected with shFASRL and control shNC,  $n=4$ . The data are expressed as the mean  $\pm$  SD. NS, non-significance

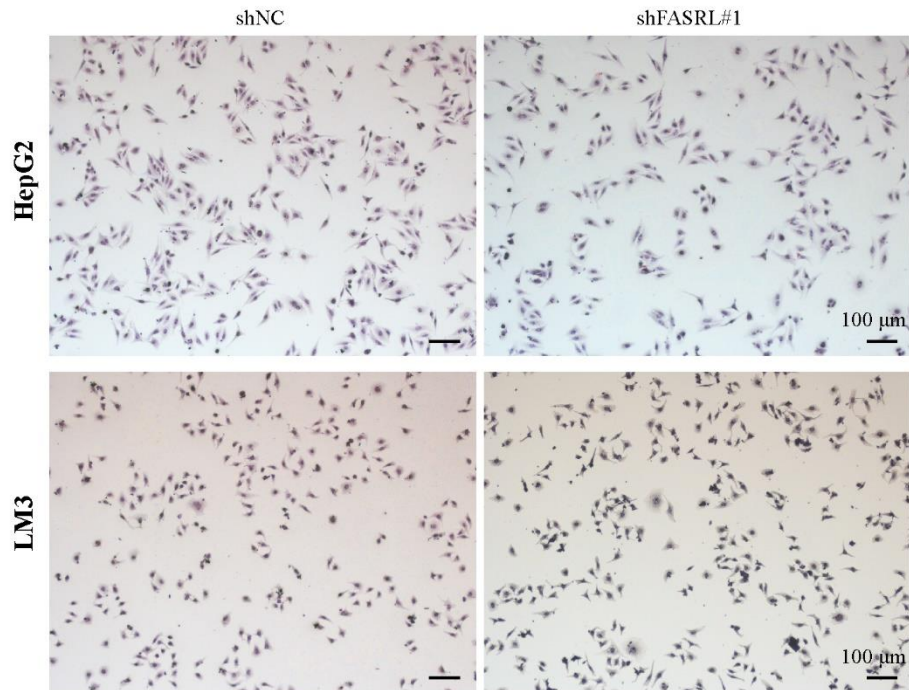

**Figure S16. The effect of FASRL knockdown on lipid droplets in HCC cell lines.** (A) Oil red O staining showing the lipid droplet content in the shFASRL#1 group and control shNC group in (upper) HepG2 and (bottom) LM3 cell lines.

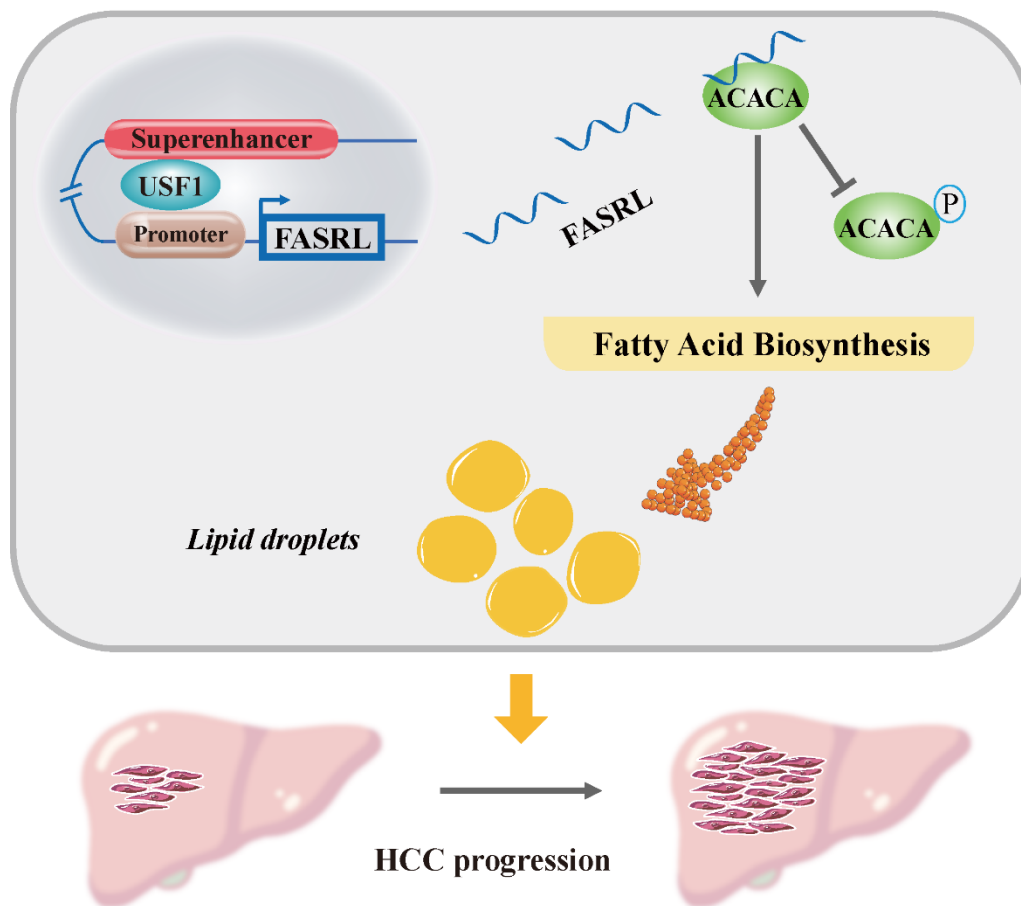

**Figure S17. Graphical overview.** USF1 binds at the promoter and superenhancer regions of FASRL to upregulate FASRL expression, which inhibits the phosphorylation of ACACA by the binding of FASRL to ACACA. This leads to an increase in *de novo* fatty acid synthesis and lipid accumulation, thus promoting HCC development.



## Supporting Tables

**Table S1. GSEA of RNA-seq data in HepG2 cells with siRNA-mediated FASRL interference**

| NAME                             | MSigDB H(hallmark)<br>Term Desc                                                        | ES       | NES      | NOM p-<br>val | FDR q-<br>val |
|----------------------------------|----------------------------------------------------------------------------------------|----------|----------|---------------|---------------|
| HALLMARK_BILE_ACID_METABOLISM    | Genes involved in metabolism of bile acids and salts.                                  | -0.53329 | -1.89798 | 0             | 0             |
| HALLMARK_COAGULATION             | Genes encoding components of blood coagulation system; also up-regulated in platelets. | -0.47883 | -1.73183 | 0             | 0.002771      |
| HALLMARK_CHOLESTEROL_HOMEOSTASIS | Genes involved in cholesterol homeostasis.                                             | -0.48431 | -1.63571 | 0.001164      | 0.007763      |
| HALLMARK_FATTY_ACID_METABOLISM   | Genes encoding proteins involved in metabolism of fatty acids.                         | -0.42791 | -1.56587 | 0             | 0.014919      |
| HALLMARK_KRAS_SIGNALING_DOWN     | Genes down-regulated by KRAS activation.                                               | -0.3975  | -1.46788 | 0.00105       | 0.045156      |
| HALLMARK_PEROXISOME              | Genes encoding components of peroxisome.                                               | -0.40777 | -1.44068 | 0.007726      | 0.051031      |
| HALLMARK_XENOBIOTIC_METABOLISM   | Genes encoding proteins involved in processing of drugs and other xenobiotics.         | -0.37322 | -1.40133 | 0.007292      | 0.071562      |
| HALLMARK_ESTROGEN_RESPONSE_LATE  | Genes defining late response to estrogen.                                              | -0.36401 | -1.35743 | 0.013528      | 0.103394      |

**Table S2. GSEA of RNA-seq data in LM3 cells with siRNA-mediated FASRL interference**

| NAME                                           | MSigDB H(hallmark)<br>Term Desc                                                                                                                     | ES       | NES      | NOM p-<br>val | FDR q-<br>val |
|------------------------------------------------|-----------------------------------------------------------------------------------------------------------------------------------------------------|----------|----------|---------------|---------------|
| HALLMARK_C<br>HOLESTEROL_<br>HOMEOSTASIS       | Genes involved in<br>cholesterol homeostasis.                                                                                                       | -0.58156 | -1.76233 | 0             | 8.28E-04      |
| HALLMARK_B<br>ILE_ACID_ME<br>TABOLISM          | Genes involve in<br>metabolism of bile acids<br>and salts.                                                                                          | -0.52538 | -1.64339 | 0             | 0.005273      |
| HALLMARK_A<br>PICAL_SURFA<br>CE                | Genes encoding proteins<br>over-represented on the<br>apical surface of<br>epithelial cells, e.g.,<br>important for cell polarity<br>(apical area). | -0.56679 | -1.63811 | 0.002144      | 0.004164      |
| HALLMARK_I<br>NTERFERON_<br>ALPHA_RESPO<br>NSE | Genes up-regulated in<br>response to alpha<br>interferon proteins.                                                                                  | -0.5151  | -1.61158 | 0             | 0.003823      |
| HALLMARK_F<br>ATTY_ACID_M<br>ETABOLISM         | Genes encoding proteins<br>involved in metabolism<br>of fatty acids.                                                                                | -0.49829 | -1.57017 | 0             | 0.005537      |
| HALLMARK_K<br>RAS_SIGNALI<br>NG_DN             | Genes down-regulated by<br>KRAS activation.                                                                                                         | -0.48938 | -1.55989 | 0             | 0.00594       |
| HALLMARK_E<br>STROGEN_RES<br>PONSE_LATE        | Genes defining late<br>response to estrogen.                                                                                                        | -0.47424 | -1.50861 | 0             | 0.013324      |
| HALLMARK_P<br>EROXISOME                        | Genes encoding<br>components of<br>peroxisome.                                                                                                      | -0.47269 | -1.46464 | 0.00813       | 0.022892      |
| HALLMARK_I<br>NTERFERON_<br>GAMMA_RESP<br>ONSE | Genes up-regulated in<br>response to IFNG<br>[GeneID=3458].                                                                                         | -0.45355 | -1.4504  | 0             | 0.02554       |
| HALLMARK_A<br>PICAL_JUNCTI                     | Genes encoding<br>components of apical                                                                                                              | -0.44844 | -1.43091 | 0.001         | 0.02838       |

|                                          |                                                                                                |          |          |          |          |
|------------------------------------------|------------------------------------------------------------------------------------------------|----------|----------|----------|----------|
| ON                                       | junction complex.                                                                              |          |          |          |          |
| HALLMARK_X<br>ENOBIOTIC_M<br>ETABOLISM   | Genes encoding proteins involved in processing of drugs and other xenobiotics.                 | -0.44209 | -1.42514 | 0        | 0.028045 |
| HALLMARK_C<br>OAGULATION                 | Genes encoding components of blood coagulation system; also up-regulated in platelets.         | -0.44525 | -1.39686 | 0.008065 | 0.036904 |
| HALLMARK_M<br>YOGENESIS                  | Genes involved in development of skeletal muscle (myogenesis).                                 | -0.42119 | -1.35342 | 0.003006 | 0.057993 |
| HALLMARK_G<br>LYCOLYSIS                  | Genes encoding proteins involved in glycolysis and gluconeogenesis.                            | -0.41083 | -1.33025 | 0.006024 | 0.07305  |
| HALLMARK_E<br>STROGEN_RES<br>PONSE_EARLY | Genes defining early response to estrogen.                                                     | -0.40459 | -1.30413 | 0.013026 | 0.092804 |
| HALLMARK_A<br>DIPOGENESIS                | Genes up-regulated during adipocyte differentiation (adipogenesis).                            | -0.39696 | -1.28479 | 0.025075 | 0.109706 |
| HALLMARK_N<br>OTCH_SIGNAL<br>ING         | Genes up-regulated by activation of Notch signaling.                                           | -0.46063 | -1.25678 | 0.162281 | 0.142596 |
| HALLMARK_C<br>OMPLEMENT                  | Genes encoding components of the complement system, which is part of the innate immune system. | -0.38471 | -1.23245 | 0.042084 | 0.174151 |
| HALLMARK_M<br>TORC1_SIGNA<br>LING        | Genes up-regulated through activation of mTORC1 complex.                                       | -0.37652 | -1.21526 | 0.061122 | 0.197975 |
| HALLMARK_H<br>EDGEHOG_SIG<br>NALING      | Genes up-regulated by activation of hedgehog signaling.                                        | -0.42904 | -1.20407 | 0.216667 | 0.212501 |
| HALLMARK_K<br>RAS_SIGNALI                | Genes up-regulated by KRAS activation.                                                         | -0.37612 | -1.19856 | 0.081162 | 0.213797 |

**Table S3. List of the primer pairs used for qRT-PCR and ChIP-qPCR**

| Gene name     | Forward primer (5'-3')       | Reverse primer (5'-3')      | Application | Manufacturer |
|---------------|------------------------------|-----------------------------|-------------|--------------|
| GAPDH         | CTGGGCTACACTGAGC<br>ACC      | AAGTGGTCGTTGAGG<br>GCAATG   | qRT-PCR     | IGE          |
| FASRL         | GGCCCATACAACACAC<br>TTCC     | AAATAACAGGCGGGC<br>TTCAC    | qRT-PCR     | IGE          |
| SETD5-<br>AS1 | ATGAGGTCTTGCTGTG<br>TTGC     | GCAACATGGCAAGAT<br>CCTGT    | qRT-PCR     | IGE          |
| HSF1          | CCATGAAGCATGAGAA<br>TGAGGC   | CTTGTTGACGACTTTC<br>TGTTGC  | qRT-PCR     | IGE          |
| SIRT6         | GTGCCAAGTGTAAGAC<br>GCAG     | CCTTGCCTTAGCCAC<br>GGT      | qRT-PCR     | IGE          |
| NELFE         | CAAGGTGGTGTCAAAC<br>GCTC     | CTTCCCCTCAAGGGTT<br>CGAG    | qRT-PCR     | IGE          |
| IRF3          | GGACTTTTCCCAGCCA<br>GACA     | TGGGGCCAACACCAT<br>GTTAC    | qRT-PCR     | IGE          |
| USF1          | TCCAGACTGCTCTAT<br>GGAGA     | CGGTGGTTACTCTGC<br>CGAAG    | qRT-PCR     | IGE          |
| POLR3G        | TAGGGAGCAGTGCCTT<br>TCAGAAT  | CCTCTTCCTTTATTCC<br>CAGCCAT | qRT-PCR     | IGE          |
| XRCC4         | ATGTTGGTGAAGTGAAG<br>AAAAGCA | GCAATGGTGTCCAAG<br>CAATAAC  | qRT-PCR     | IGE          |
| TRIM28        | TGAGACCTGTGTAGAG<br>GCG      | CGTTCACCATCCCGA<br>GACTT    | qRT-PCR     | IGE          |
| ZNF263        | CAGTTGCCTGAGAGCT<br>TAGAGG   | TGACTGGGAATGTGA<br>GACTCC   | qRT-PCR     | IGE          |
| MAX           | CCGAGGTTTCAATCTG<br>CGG      | GAGGTCGTCAATATC<br>TTGCTGG  | qRT-PCR     | IGE          |
| ALDH3A1       | CTCGTCATTGGCACCT<br>GGAAC    | CTCGCCATGTTCTCAC<br>TCAGCT  | qRT-PCR     | IGE          |
| ID1           | GCCGCAGACTGTGCTC<br>AAAGC    | CCTGTTGCTTGTCGAG<br>GTGGTT  | qRT-PCR     | IGE          |

|          |                             |                            |           |     |
|----------|-----------------------------|----------------------------|-----------|-----|
| DLD      | GGGACTAGAAGAGCTG<br>GGAATTG | CATCCTCTGCTTTGTG<br>AGCCAG | qRT-PCR   | IGE |
| HMGCS1   | AAGTCACACAAGATGC<br>TACACCG | TCAGCGAAGACATCT<br>GGTGCCA | qRT-PCR   | IGE |
| CPOX     | TGAAGGAGGCTTGTGA<br>CCAGCA  | AGCGAAACACCTCCT<br>CCTTGGA | qRT-PCR   | IGE |
| TP53INP2 | TTCGTGTCTGGAGGAGG<br>ATGAAG | AACCAGCTCTCGTCC<br>ATCAAGG | qRT-PCR   | IGE |
| E4A      | GGGAGTCGCGTGTGTGA<br>GTGC   | CCGCCCTTGTAGGCT<br>GTCCA   | ChIP-qPCR | IGE |
| E4B      | GACCCAACGCCTGAAT<br>CCTG    | CCAGCCCCGAGAGAC<br>TTTTTC  | ChIP-qPCR | IGE |
| E4C      | GGGAGGGGATTGTAGG<br>GGTG    | CTCTTGGGACGACTT<br>CCACC   | ChIP-qPCR | IGE |
| E4D      | AGTCCAGGGATCAAGT<br>GGGCA   | CTTCCAAATCCGCAG<br>TCACAG  | ChIP-qPCR | IGE |

**Table S4. Deposited Data table**

| Deposited Data                           | Source                                                                                                                                  | Identifier                                     |
|------------------------------------------|-----------------------------------------------------------------------------------------------------------------------------------------|------------------------------------------------|
| H3K27ac ChIP-seq in Normal liver tissues | EMBL-EBI ( <a href="https://www.ebi.ac.uk/">https://www.ebi.ac.uk/</a> )                                                                | SRR2002343                                     |
| H3K27ac ChIP-seq in HepG2 cells          | UCSC ( <a href="http://genome.ucsc.edu/ENCODE/downloads.html">http://genome.ucsc.edu/ENCODE/downloads.html</a> )                        | wgEncodeBroadHistoneHepg2H3k27acStdRawDataRep2 |
| H3K27ac ChIP-seq in Huh7 cells           | EMBL-EBI ( <a href="https://www.ebi.ac.uk/">https://www.ebi.ac.uk/</a> )                                                                | SRR4453268                                     |
| H3K27ac ChIP-seq in PLC cells            | This paper                                                                                                                              |                                                |
| H3K27ac ChIP-seq in LM3 cells            | <a href="https://www.ncbi.nlm.nih.gov/geo/query/acc.cgi?acc=GSE181753">https://www.ncbi.nlm.nih.gov/geo/query/acc.cgi?acc=GSE181753</a> | GSM5510395                                     |
| USF1 ChIP-seq in HepG2 cells             | <a href="https://www.ncbi.nlm.nih.gov/geo/query/acc.cgi?acc=GSE32465">https://www.ncbi.nlm.nih.gov/geo/query/acc.cgi?acc=GSE32465</a>   | GSM803527                                      |
| ChIA-PET in human HepG2 cells            | ENCODE ( <a href="https://www.encodeproject.org">https://www.encodeproject.org</a> )                                                    | ENCSR146FPM                                    |
| RNA-seq in HCC cells                     | CCLC ( <a href="https://portals.broadinstitute.org/ccle">https://portals.broadinstitute.org/ccle</a> )                                  | CCLC_ID: _LIVER                                |

RNA-seq in TCGA LIHC      TCGA (<https://cancergenome.nih.gov/>)      LIHC samples  
 RNA-seq in HepG2 and LM3      This paper  
 cells transfected with  
 siFASRL and siNC

**Table S5. List of the siRNA sequences of target genes**

| Gene name     | Targets | Sense (5'-3')             | Antisense (5'-3')         | Application | Manufacturer |
|---------------|---------|---------------------------|---------------------------|-------------|--------------|
| FASRL         | #1      | GCUCCGUGGAG<br>ACGAAUUUTT | AAAUUCGUCUC<br>CACGGAGCTT | siRNA       | GenePharma   |
|               | #2      | GCCAUGGGACA<br>GUCCAGUUTT | AACUGGACUGU<br>CCCAUGGCTT | siRNA       | GenePharma   |
|               | #3      | GCCCGCCUGUU<br>AUUCCAUTT  | AUGGAAAUAAC<br>AGGCGGGCTT | siRNA       | GenePharma   |
|               | #4      | GGCCAGACGCC<br>CAUCCAAUTT | AUUGGAUGGGC<br>GUCUGGCCTT | siRNA       | GenePharma   |
|               | #5      | UCUGGAAGCGU<br>UGGGAUUUTT | AAAUCCCAACG<br>CUUCCAGATT | siRNA       | GenePharma   |
| SETD5-<br>AS1 | #1      | GTGATGACATCC<br>TCATTGATT | TCAATGAGGAT<br>GTCATCACTT | siRNA       | GenePharma   |
|               | #2      | GAATGGTGCTAT<br>ACTTGAATT | TTCAAGTATAGC<br>ACCATTCTT | siRNA       | GenePharma   |
|               | #3      | CAGGACAGTTCT<br>TATGGCTTT | AGCCATAAGAA<br>CTGTCCTGTT | siRNA       | GenePharma   |
| HSF1          | #1      | UGAGAACAUCA<br>AGAGGAAA   | UUUCCUCUUGA<br>UGUUCUCA   | siRNA       | RiboBio      |
|               | #2      | CAUCCAUGCC<br>CAAGUAUA    | UAUACUUGGGC<br>AUGGAAUG   | siRNA       | RiboBio      |
|               | #3      | UCGUCAACAAG<br>CUCAUUCA   | UGAAUGAGCUU<br>GUUGACGA   | siRNA       | RiboBio      |
| SIRT6         | #1      | AGUCUCCAGU<br>GUGGUGUU    | AACACCACACU<br>GGAAGACU   | siRNA       | RiboBio      |
|               | #2      | GGAACAUGUUU<br>GUGGAAGA   | UCUCCACAAA<br>CAUGUCC     | siRNA       | RiboBio      |

|            |    |                           |                           |       |            |
|------------|----|---------------------------|---------------------------|-------|------------|
| NELFE      | #3 | GUAGAAACUGU<br>GGAUUCUU   | AAGAAUCCACA<br>GUUUCUAC   | siRNA | RiboBio    |
|            | #1 | GCCUUCGUCAC<br>CUAUGAAA   | UUUCAUAGGUG<br>ACGAAGGC   | siRNA | RiboBio    |
|            | #2 | AAGUCAACAUA<br>GCCC AAA   | UUUCGGGCUAU<br>GUUGACUU   | siRNA | RiboBio    |
| IRF3       | #3 | ACCAAGAACUC<br>AGGCUUCA   | UGAAGCCUGAG<br>UUCUUGGU   | siRNA | RiboBio    |
|            | #1 | UGGAGAAUACU<br>GUGGACCU   | AGGUCCACAGU<br>AUUCUCCA   | siRNA | RiboBio    |
|            | #2 | CACCACCUCAA<br>CCAAUAAA   | UUUAUUGGUUG<br>AGGUGGUG   | siRNA | RiboBio    |
| USF1       | #3 | AGACAUUCUGG<br>AUGAGUUA   | UAACUCAUCCA<br>GAAUGUCU   | siRNA | RiboBio    |
|            | #1 | AGACGCACUAU<br>ACUUACUU   | AAGUAAGUAUA<br>GUGCGUCU   | siRNA | RiboBio    |
|            | #2 | CGAGACAAGAU<br>CAACAACU   | AGUUGUUGAUC<br>UUGUCUCG   | siRNA | RiboBio    |
| POLR3<br>G | #3 | GAGAUACAAAG<br>ACCUCAA    | UUGGAGGUCUU<br>UGUAUCUC   | siRNA | RiboBio    |
|            | #1 | GGCUGUUGGAU<br>UUAGCAA    | UUUGC UAAAUC<br>CAACAGCC  | siRNA | RiboBio    |
|            | #2 | UGAAACACCUG<br>AAGAAAGA   | UCUUUCUUCAG<br>GUGUUUCA   | siRNA | RiboBio    |
| XRCC4      | #3 | CCACUCAUCUG<br>GUAUAACU   | AGUUAUACCAG<br>AUGAGUGG   | siRNA | RiboBio    |
|            | #1 | GCCTGATTCTTC<br>ACTACCT   | GCCTGATTCTTC<br>ACTACCT   | siRNA | RiboBio    |
|            | #2 | GCAATCTGTTCT<br>GAAATGA   | TCATTT CAGAAC<br>AGATTGC  | siRNA | RiboBio    |
| TRIM28     | #3 | CACTGATATTGC<br>ACCAAGT   | CACTGATATTGC<br>ACCAAGT   | siRNA | RiboBio    |
|            | #1 | GCAACAGUGCU<br>UCUCCAAATT | UUUGGAGAAGC<br>ACUGUUGCTT | siRNA | GenePharma |
|            | #3 | GGGACAAACAU<br>GCAACAUUTT | AAUGUUGCAUG<br>UUUGUCCCTT | siRNA | GenePharma |

|        |    |                           |                           |       |            |
|--------|----|---------------------------|---------------------------|-------|------------|
| ZNF263 | #5 | GGAUGACAGUG<br>CCACCAUUTT | AAUGGUGGCAC<br>UGUCAUCCTT | siRNA | GenePharma |
|        | #1 | GAACCCACGTTT<br>CCTGTCA   | GAACCCACGTTT<br>CCTGTCA   | siRNA | RiboBio    |
|        | #2 | GTGCAACATTTG<br>CGGAAAA   | TTTCCGCAAAT<br>GTTGCAC    | siRNA | RiboBio    |
|        | #3 | GGAAGGTGTTCC<br>GTCTGTA   | GGAAGGTGTTCC<br>GTCTGTA   | siRNA | RiboBio    |
| MAX    | #1 | CAAAGACAGCU<br>UUCACAGUTT | ACUGUGAAAGC<br>UGUCUUUGTT | siRNA | GenePharma |
|        | #3 | GGAGAGCGACG<br>AAGAGCAATT | UUGCUCUUCGU<br>CGCUCUCCTT | siRNA | GenePharma |
|        | #5 | GCAGCACCAUC<br>UCUGCCUUTT | AAGGCAGAGAU<br>GGUGCUGCTT | siRNA | GenePharma |

**Table S6. List of the shRNA sequences**

| Gene Name | Targets | Sequence (5'-3')                                                       | Application | Manufacturer |
|-----------|---------|------------------------------------------------------------------------|-------------|--------------|
| FASRL     | #1      | CCGGGCTCCGTGGAGACGAAT<br>TTCTCGAGAAATTCGTCTCCAC<br>GGAGCTTTTTGAATT     | shRNA       | IGE          |
|           | #5      | CCGGTCTGGAAGCGTTGGGAT<br>TTCTCGAGAAATCCCAACGCTT<br>CCAGATTTTTGAATT     | shRNA       | IGE          |
| USF1      |         | CCGGCGAGACAAGATCAACAA<br>CTCTCGAGAGTTGTTGATCTTG<br>TCTCGTTTTTGAATT     | shRNA       | IGE          |
| ACACA     |         | CCGGTACAAGGGATACAGGTA<br>TTTACTCGAGTAAATACCTGTA<br>TCCCTTGTATTTTTGAATT | shRNA       | IGE          |

**Table S7. List of the FASRL enhancer sequences inserted into the pGL3-promoter vector**

| Enhancer Name | Sequence (5'-3')                             |
|---------------|----------------------------------------------|
| NC            | CTGAGGCAGGAGAATGGCATGAACCCAGGAAGCGGAGCTTGCAG |



---

TGAGCCGAGATCACGCCACTGCACTCCAGCCTGGGCGACAGAGC  
AAGACTCCGTCTCAAAAAAAAAAAAAAAAAAAAAAAAAAAAA  
AGCACAGATGGGGCTGGGCGTGGTGGCTCACACCTGTAATCCCCG  
CACTTTGGGAGGCCAAGGTGGGTGGATCACCTGAGGTCAGGAGTT  
CAAGACCAGCCTGGGCAGCATGGTGAAAACCAGTCTCTATTTAAA  
AAAATAATAATAACAGAAATTAGTTGGGCACAGCAGCACTTG  
CCTGTAATCCCAGCTACTCGGGAGGCTGAGGCAGAAGAA  
E1 GCACTCCAGCCTGCGCAACAGAGCAAGCCTCTGTCTCAAACAAAC  
AAACAAAAGATGCTTGTGAATAGGCAATTTAAAAGTTTTCTGGG  
CCCTGGAGGGTTCATTTTCCCTTCCTGCCACTTAAGTAGCTGAGCA  
ACATGACCTGGGAGGAGTTAGACTATTAGAGTTTACCCTGAGAGA  
GGCCACAAGATGCACACACGGATAACCTCTTCAGGGTACAATGG  
CATTAGTGTGTTAGGAGAGGTAAGGGACAAAGTTCAACAGAAGG  
CTGGGTGTGGTGGCTCATGCCTGTAATCGTAGCACTTTGGGAGAC  
CGAGGCGGGTGGATTACTTGAGGTCAGGAGCTAGAGACCAGCCT  
GGCCAACATGGTGAAACCCC  
E2 CATTACCACCGCCCTTTTTTGTGTTTAAGCTACACGTAAATACAGA  
ACATTCTGTAAGATTGAAAAGTCAGGAAATAGTTCCTGCCCTAGT  
ATTGGAGGAGAGGGTGCCAGTGCCTCGACGCTGAAGAATGAAAT  
ACAAGGGAAACAGCAACCACCGTGTATGCGGCAAGCCTCTCAGC  
TGTCAGAATCTATTCCCTGCTGTCTCTGCCAGTAACTCATGCTGGG  
CTACCAATCCCCAGCTTAGTCCCTTTCTCAGAGATCCTGATAATTT  
CAGTTTGTCAACTGCAAGGGCAGTCTGTTCCCTCCACTCACTTTGAC  
CAAGATGGGCTTCTTTGTGTACAGGCGCATTTTTAGAGGCAGGAC  
C  
E3 AGCAACTTATTTCAAAGTGTTTTAGATACTATAGACCAAAGAGG  
TATGGGCTGTGACCGTAAGCCTGATTTGGCCTCTGACGGCCAGTT  
TCTGACCACAGTTTTGGAGGGAATTTCTGCTTCCAAGGTCAAGTTT  
CTCCTAAATGCCCACTAGAGTTCGTGGGGTGGAGTGAGGAAGGAT  
CCGCGACACCGGATACAAACAGAAGCTCTCCTTCTCCCGGAGTCC  
GATCAAGGCTCATCCCAGGTCCCTAATCTCTTCCCTTTGTGGGTTT  
TGAGTCAAGGAACAAAATTCAGGGCCAAGCCCCTACAACCTCCTC  
CACAGGCACCAGTGCTCGAGAGACGACCGCCAAGCACCCCGCCC  
TTTGCAGCACTACCGACCATGGCTCTGGTGCAGTCCGGGGCGCT  
E4 GGGAGTCGCGTGTGTAGTGACGGTGCATTCTCTTATATATCCT  
GTCCGGCCCGTTTGAGGTGGACAGCCTACAAGGGCGGGACCCAA

CGCCTGAATCCTGGGGTGCTGGGCGGAGGATGCTGAGGCTGCAG  
CTCCAGGAAGGGAGGGAGCCTGGGGGATGAAGGAGGGGCCTCTC  
CACTCTCACCCGCCGGAGCAACTGGTGGAAGTCAAGAAAAGTCTC  
TCGGGGCTGGGGGAGGGGATTGTAGGGGTGTGTGTGACAGAGGC  
CTCAAAAATCTGGCTGGGGGTGCTAAGGCAAGCCCATCTGCGCAC  
TGTGCCCTGAGGTGCAAGAGGATGCAGGGTGGAAAGTCGTCCCAA  
GAGAGTCCAGGGATCAAGTGGGCATGCCCTTTTAGCCTTGGCACG  
AAATGGAGCAGAAAAAGAGCCGGATGCGGATTACTGTGGTGGCC  
TAGGCTCAGATTCTGCTGAGTCACTGTGACTGCGGATTTGGAAG  
E5 TACAACACACTTCCCTGGGTGCATGCCACTGCACCACCCCTGCTC  
CTCAAGGCAGGTAATGGGGGA ACTAATTGGTTTTGTTTCCCATGA  
GCTAAGGCAAGGCTGGTGTGGAGATAGCAGTTATAGGGAAGCAT  
ATTAAAGAATAGCCAAAACGGGACCAGGCGCGGTGGCTCACGCC  
TGTAATCCCAGCAATATGGGAGGCCGAGGTGGGTGGATCACCTG  
AGGTCAGGAGTTCGAGACCAGCCTGGCCAACCTGGTGAAGCCCC  
GTCTGTACTGAAAAATTAGCTGGGCGTGATGGCGGGCGCCTGTAA  
GTCCCAGCTACTCGGGAGGCTGAGG

---
